# Supplementary material for: Which value aspects are relevant for the evaluation of medical devices? Exploring stakeholders’ views through a Web-Delphi process
Source: Springer Nature journal article supplement (doi:10.1186/s12913-023-09550-0), 2023-06-08
Supplement: MOESM1 [file 25464128]

## Additional file 1

Table 1.1. List and descriptions of the 34 aspects used in the Web-Delphi process, translated to English (original list and descriptions delivered in Portuguese).

| Aspect                                                                 | Description                                                                                                                                                                                                                                                                                                                                                                                  |
|------------------------------------------------------------------------|----------------------------------------------------------------------------------------------------------------------------------------------------------------------------------------------------------------------------------------------------------------------------------------------------------------------------------------------------------------------------------------------|
| Specific features of the medical device                                | Relevant characteristics such as: lifetime of the medical device, contact with the patient's body (direct: invasive and non-invasive; indirect), length of hospital stay; limitations compared to alternatives.                                                                                                                                                                              |
| Technical performance of the medical device                            | Performance of a medical device or response of the patient(s) to the medical device regarding its intended purpose and as indicated by the manufacturer, when properly applied to the appropriate patient(s).                                                                                                                                                                                |
| Regulatory status of the medical device                                | Current regulatory status of the medical device and adherence to market approval requirements.                                                                                                                                                                                                                                                                                               |
| Sensitivity and Specificity                                            | Ability of the medical device to correctly identify positives and negatives in testing a population.                                                                                                                                                                                                                                                                                         |
| User-friendliness for the healthcare professional                      | Extent to which the medical device is comfortable and easy to be used by the healthcare professional (e.g., depth perception, eye-hand coordination or hours required to perform the examinations (compared to the expected time)]. The procedures for using the medical device are defined and clear. Extent to which the result of the medical device is easy to understand and interpret. |
| Time between procedure and results                                     | Extent to which medical device results are instantly available.                                                                                                                                                                                                                                                                                                                              |
| Need for training of the healthcare professional                       | Need for training of health professionals to ensure specific knowledge necessary for the use of the medical device.                                                                                                                                                                                                                                                                          |
| Learning curve of the healthcare professional                          | Improvements in the use of the medical device by the healthcare professional (e.g., evolution of speed and accuracy of use).                                                                                                                                                                                                                                                                 |
| Exposure of the healthcare professional to physical or chemical agents | Exposure (internal or external) of the health professional to specific physical and chemical agents, metabolites, or reaction products.                                                                                                                                                                                                                                                      |
| Workload for the healthcare professional                               | Extent to which the medical device can be implemented without drastic changes in the current way of working and in the workload of healthcare professionals.                                                                                                                                                                                                                                 |
| Comfort for the patient                                                | Extent to which the use of the medical device is expected to improve the service offered to the patient (including patient satisfaction).                                                                                                                                                                                                                                                    |
| Connectivity                                                           | Ability to transfer information between different devices and decision support, including security solutions in the transmission of biosignals.                                                                                                                                                                                                                                              |
| Clinical efficacy and/or effectiveness                                 | Measure of the beneficial effect of a technology, i.e., the medical device's ability to produce a desired (beneficial) change in the signs, symptoms and evolution of the target health condition.                                                                                                                                                                                           |
| Risk analysis                                                          | Considers risk factors related to the potential number of patients at risk of harm: the likelihood of a medical device having problems, the likelihood of a patient being harmed, and the total number of patients exposed.                                                                                                                                                                  |
| Adverse events for the patient                                         | Severity and frequency of adverse events and their impacts.                                                                                                                                                                                                                                                                                                                                  |

|                                                                      |                                                                                                                                                                                                                                                                                                          |
|----------------------------------------------------------------------|----------------------------------------------------------------------------------------------------------------------------------------------------------------------------------------------------------------------------------------------------------------------------------------------------------|
| Quality of the available scientific evidence                         | Robustness of the sources of evidence and quality of the evidence, regarding the target population and the intended clinical course, in a complete, consistent and relevant way, with the problems properly reported (risk of bias, imprecision, inconsistency, indirect evidence and publication bias). |
| Target population                                                    | Number of people affected by the target condition or relevant subgroup(s) in a specific time period.                                                                                                                                                                                                     |
| Impact of the disease                                                | Impact of health condition on: the disease burden for the patient and society, the incidence and prevalence and the natural history of the disease without treatment.                                                                                                                                    |
| Patient-reported outcomes                                            | Patient's perspective on a disease/treatment that may not be captured by a clinical measure, but of importance to the patient and their adherence to treatment or use of the medical device.                                                                                                             |
| Quality of life for the patient                                      | Expected impact on the patient's quality of life.                                                                                                                                                                                                                                                        |
| Space for innovation for the healthcare organization                 | Capacity to adopt the medical device.                                                                                                                                                                                                                                                                    |
| Clinical guidelines                                                  | Extent to which the medical device is recommended in national clinical guidelines.                                                                                                                                                                                                                       |
| Financing                                                            | Extent to which the medical device is reimbursed; DRG (diagnostic-related groups) tariff or additional payments for the medical device (coverage).                                                                                                                                                       |
| Public health interest                                               | Impact of the use of the medical device on public health and society.                                                                                                                                                                                                                                    |
| Budget impact to the health system                                   | Impact of medical device adoption on health system budget.                                                                                                                                                                                                                                               |
| Equity                                                               | Fairness in the allocation of resources, treatments or results between different individuals or groups.                                                                                                                                                                                                  |
| Market competitiveness                                               | Competition in the market, in terms of the number of competing products.                                                                                                                                                                                                                                 |
| Medical or technical complications for the patient                   | Expected occurrence and severity of medical and technical complications related to the procedure (for example, with surgery to implant the medical device).                                                                                                                                              |
| Stakeholders agreement on the adoption of the medical device         | Agreement between key actors (groups of stakeholders) or individuals in the health context, that is, the extent to which the adoption of the medical device is aligned with common goals.                                                                                                                |
| Environmental impact of the production and use of the medical device | Extent to which the production and use or implementation of the medical device causes environmental damage.                                                                                                                                                                                              |
| Efficiency                                                           | Potential cost savings with the adoption of the medical device, considering the affordability of the medical device and the opportunity cost (lost alternatives).                                                                                                                                        |
| Capacity of the health system                                        | Adjustment of the medical device to the existing infrastructures and qualifications in the health system.                                                                                                                                                                                                |
| Cost of the medical device (including complementary equipment)       | Costs with the medical device (e.g., disposable items) and other equipment inherent to the use of the medical device, maintenance (sterilization, licensing or updates) and training.                                                                                                                    |
| Cost of procedure without the cost of the medical device             | Costs arising from the number of human resources required, time of use and infrastructure, for example, operating room (without considering the cost of the medical device).                                                                                                                             |
