# Supplementary material for: Which value aspects are relevant for the evaluation of medical devices? Exploring stakeholders’ views through a Web-Delphi process
Source: Springer Nature journal article supplement (doi:10.1186/s12913-023-09550-0), 2023-06-08
Supplement: MOESM2 [file 25464128]

## Additional file 2

Table 2.1. Statistical tests results for each type of medical devices: Kruskal-Wallis with 4 degrees of freedom and Dunn post hoc test, corrected with Bonferroni test.

|                                                                        | Implantable medical devices |           |                                                                      | In vitro tests based on biomarkers |          |                                                                      |
|------------------------------------------------------------------------|-----------------------------|-----------|----------------------------------------------------------------------|------------------------------------|----------|----------------------------------------------------------------------|
|                                                                        | Kruskal-Wallis test         |           | Dunn-Bonferroni test                                                 | Kruskal-Wallis test                |          | Dunn-Bonferroni test                                                 |
|                                                                        | H(4)                        | p-value   | Groups with statistically significant differences (adjusted p-value) | H(4)                               | p-value  | Groups with statistically significant differences (adjusted p-value) |
| Specific features of the medical device                                | 1.1202                      | 0.8911    |                                                                      | 7.01                               | 0.1354   |                                                                      |
| Technical performance of the medical device                            | 3.255                       | 0.5161    |                                                                      | 2.033                              | 0.7297   |                                                                      |
| Regulatory status of the medical device                                | 6.3812                      | 0.1724    |                                                                      | 6.2413                             | 0.1818   |                                                                      |
| Sensitivity and Specificity                                            | 15.447                      | 0.003858* | Industry and Patients and citizens (0.0449*)                         | 6.1482                             | 0.1883   |                                                                      |
| User-friendliness for the healthcare professional                      | 4                           | 0.406     |                                                                      | 8.6689                             | 0.06993  |                                                                      |
| Time between procedure and results                                     | 2.4344                      | 0.6564    |                                                                      | 1.0451                             | 0.9029   |                                                                      |
| Need for training of the healthcare professional                       | 2.6251                      | 0.6224    |                                                                      | 5.5108                             | 0.2388   |                                                                      |
| Learning curve of the healthcare professional                          | 9.4885                      | 0.04998   |                                                                      | 3.3174                             | 0.5062   |                                                                      |
| Exposure of the healthcare professional to physical or chemical agents | 12.934                      | 0.0116*   | Healthcare professionals and Patients and citizens (0.0405*)         | 6.5662                             | 0.1607   |                                                                      |
| Workload for the healthcare professional                               | 2.7791                      | 0.5955    |                                                                      | 7.9821                             | 0.09224  |                                                                      |
| Comfort for the patient                                                | 5.4843                      | 0.2411    |                                                                      | 6.6431                             | 0.156    |                                                                      |
| Connectivity                                                           | 4.0918                      | 0.3937    |                                                                      | 1.6997                             | 0.7908   |                                                                      |
| Clinical efficacy and/or effectiveness                                 | 3.8628                      | 0.4249    |                                                                      | 4.9357                             | 0.294    |                                                                      |
| Risk analysis                                                          | 2.0747                      | 0.722     |                                                                      | 2.797                              | 0.5923   |                                                                      |
| Adverse events for the patient                                         | 3.5126                      | 0.476     |                                                                      | 5.4578                             | 0.2435   |                                                                      |
| Quality of the available scientific evidence                           | 7.319                       | 0.12      |                                                                      | 4.4289                             | 0.3511   |                                                                      |
| Target population                                                      | 11.702                      | 0.01971*  | Academics and Patients and citizens (0.0447*)                        | 9.5509                             | 0.04871* | Academics and Patients and citizens (0.0370*)                        |
| Impact of the disease                                                  | 9.8507                      | 0.04302*  | Industry and Patients and citizens (0.0282*)                         | 5.5522                             | 0.2352   |                                                                      |
| Patient-reported outcomes                                              | 7.2508                      | 0.1232    |                                                                      | 4.2598                             | 0.372    |                                                                      |
| Quality of life for the patient                                        | 6.8498                      | 0.144     |                                                                      | 6.2529                             | 0.181    |                                                                      |
| Space for innovation for the healthcare organization                   | 4.5155                      | 0.3407    |                                                                      | 3.4667                             | 0.483    |                                                                      |
| Clinical guidelines                                                    | 1.5567                      | 0.8166    |                                                                      | 4.1905                             | 0.3808   |                                                                      |
| Financing                                                              | 4.4924                      | 0.3435    |                                                                      | 5.0755                             | 0.2796   |                                                                      |

|                                                                      |        |          |                                                  |         |           |                                                   |
|----------------------------------------------------------------------|--------|----------|--------------------------------------------------|---------|-----------|---------------------------------------------------|
| Public health interest                                               | 8.971  | 0.06183  |                                                  | 3.8203  | 0.4309    |                                                   |
| Budget impact to the health system                                   | 2.9802 | 0.5611   |                                                  | 8.8985  | 0.06369   |                                                   |
| Equity                                                               | 4.189  | 0.381    |                                                  | 1.7564  | 0.7804    |                                                   |
| Market competitiveness                                               | 8.5699 | 0.0728   |                                                  | 2.0077  | 0.7343    |                                                   |
| Medical or technical complications for the patient                   | 4.5029 | 0.3422   |                                                  | 1.8812  | 0.7576    |                                                   |
| Stakeholders agreement on the adoption of the medical device         | 2.1309 | 0.7117   |                                                  | 1.1193  | 0.8912    |                                                   |
| Environmental impact of the production and use of the medical device | 5.4038 | 0.2483   |                                                  | 0.82552 | 0.935     |                                                   |
| Efficiency                                                           | 7.2125 | 0.1251   |                                                  | 4.5049  | 0.342     |                                                   |
| Capacity of the health system                                        | 4.1637 | 0.3843   |                                                  | 1.9728  | 0.7408    |                                                   |
| Cost of the medical device (including complementary equipment)       | 11.058 | 0.02592* | Academics and Patients and citizens (0.0266*)    | 17.322  | 0.001674* | Academics and Healthcare professionals (0.00718*) |
| Cost of procedure without the cost of the medical device             | 12.119 | 0.01649* | Academics and Healthcare professionals (0.0326*) | 7.5593  | 0.1091    |                                                   |

\* p-value < 0.05
