# Supplementary material for: Which value aspects are relevant for the evaluation of medical devices? Exploring stakeholders’ views through a Web-Delphi process
Source: Springer Nature journal article supplement (doi:10.1186/s12913-023-09550-0), 2023-06-08
Supplement: MOESM3 [file 25464128]

### Additional file 3

Table 3.1. Percent agreement, Gwet's coefficient of groups of stakeholders for both types of medical devices in both rounds of the Web-Delphi process, and strength of agreement according to Landis and Koch and to Gwet's proposed benchmarking method.

| Groups of stakeholders             | Round 1           |                       |                                         |                                           | Round 2           |                       |                                         |                                           |
|------------------------------------|-------------------|-----------------------|-----------------------------------------|-------------------------------------------|-------------------|-----------------------|-----------------------------------------|-------------------------------------------|
|                                    | Percent agreement | Gwet's AC2 (95% CI)   | Landis and Koch's strength of agreement | Gwet's strength of agreement <sup>1</sup> | Percent agreement | Gwet's AC2 (95% CI)   | Landis and Koch's strength of agreement | Gwet's strength of agreement <sup>1</sup> |
| IMPLANTABLE MEDICAL DEVICES        |                   |                       |                                         |                                           |                   |                       |                                         |                                           |
| Academics                          | 0.88              | 0.68<br>(0.62 – 0.74) | Substantial                             | Substantial                               | 0.90              | 0.74<br>(0.69 – 0.79) | Substantial                             | Substantial                               |
| Buyers and policymakers            | 0.88              | 0.65<br>(0.57 – 0.73) | Substantial                             | Moderate                                  | 0.91              | 0.76<br>(0.69 – 0.83) | Substantial                             | Substantial                               |
| Healthcare professionals           | 0.90              | 0.73<br>(0.70 – 0.76) | Substantial                             | Substantial                               | 0.91              | 0.77<br>(0.75 – 0.80) | Substantial                             | Substantial                               |
| Industry                           | 0.89              | 0.70<br>(0.63 – 0.76) | Substantial                             | Substantial                               | 0.90              | 0.73<br>(0.67 – 0.79) | Substantial                             | Substantial                               |
| Patients and citizens              | 0.89              | 0.70<br>(0.67 – 0.74) | Substantial                             | Substantial                               | 0.92              | 0.79<br>(0.75 – 0.82) | Substantial                             | Substantial                               |
| IN VITRO TESTS BASED ON BIOMARKERS |                   |                       |                                         |                                           |                   |                       |                                         |                                           |
| Academics                          | 0.88              | 0.65<br>(0.60 – 0.71) | Substantial                             | Substantial                               | 0.91              | 0.75<br>(0.71 – 0.79) | Substantial                             | Substantial                               |
| Buyers and policymakers            | 0.85              | 0.55<br>(0.41 – 0.69) | Moderate                                | Moderate                                  | 0.88              | 0.67<br>(0.56 – 0.78) | Substantial                             | Moderate                                  |
| Healthcare professionals           | 0.89              | 0.69<br>(0.66 – 0.73) | Substantial                             | Substantial                               | 0.90              | 0.74<br>(0.70 – 0.77) | Substantial                             | Substantial                               |
| Industry                           | 0.84              | 0.52<br>(0.42 – 0.62) | Moderate                                | Moderate                                  | 0.85              | 0.56<br>(0.47 – 0.65) | Moderate                                | Moderate                                  |
| Patients and citizens              | 0.87              | 0.63<br>(0.59 – 0.66) | Substantial                             | Substantial                               | 0.89              | 0.70<br>(0.66 – 0.74) | Substantial                             | Substantial                               |

<sup>1</sup>The strength of agreement was established following Gwet's proposed benchmarking method, with the Landis and Koch benchmark scale and the 95% cut-off point for the cumulative probabilities.
